# Supplementary material for: Set2 Methyltransferase Facilitates DNA Replication and Promotes Genotoxic Stress Responses through MBF-Dependent Transcription
Source: PubMed Central journal article supplement (PMC5608972; doi:10.1016/j.celrep.2017.08.058), 2017-09-12
Supplement: mmc1.pdf [file mmc1.pdf]

**Cell Reports, Volume 20**

**Supplemental Information**

**Set2 Methyltransferase Facilitates DNA**

**Replication and Promotes Genotoxic Stress**

**Responses through MBF-Dependent Transcription**

**Chen-Chun Pai, Anastasiya Kishkevich, Rachel S. Deegan, Andrea Keszthelyi, Lisa Folkes, Stephen E. Kearsey, Nagore De León, Ignacio Soriano, Robertus Antonius Maria de Bruin, Antony M. Carr, and Timothy C. Humphrey**

## Supplementary information

A

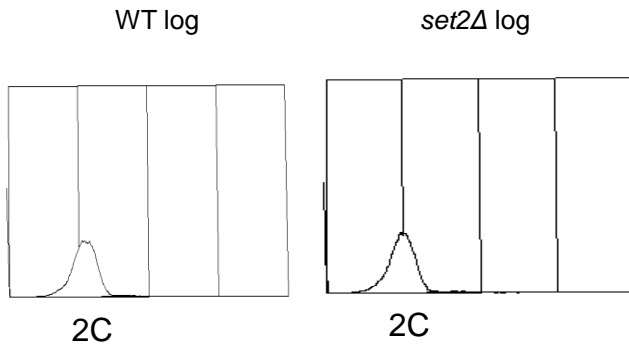

B

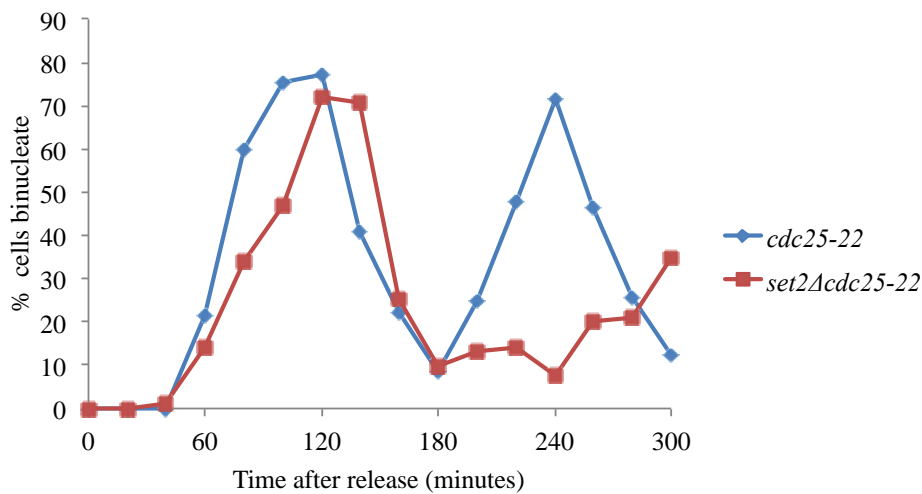

C

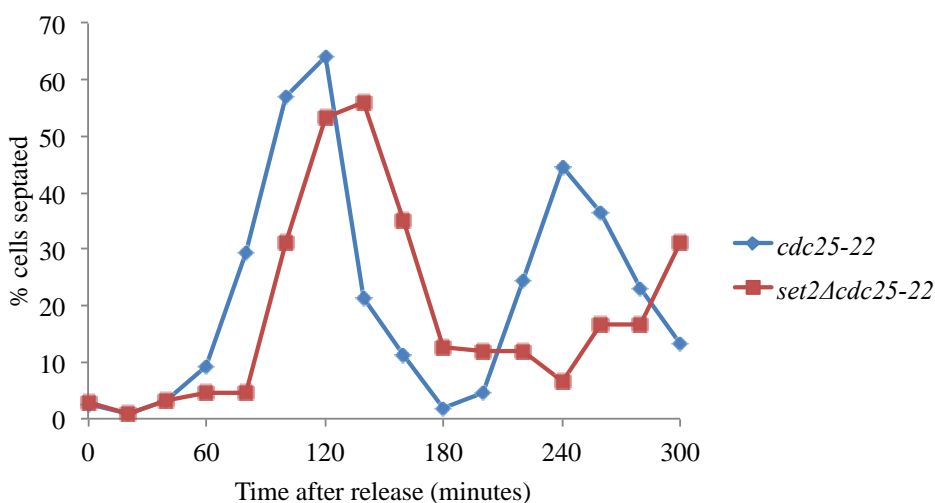

**Figure S1 *set2Δ* cells exhibit significant S-phase delay in synchronised cell culture, related to Figure 1.** (A) A wild-type or *set2Δ* strain was grown in YES medium to early log phase (OD 0.2-0.5) at 32°C. Cells from wild-type (WT) or *set2Δ* cells were fixed with 70% ethanol, and examined by flow cytometry determining DNA contents of the cells. (B) Cell cycle analysis of *cdc25-22* and *set2Δcdc25-22* cells following release from *cdc25-22* block (35.5°C; 4.25 hours). Percentage of binucleate cells following release from *cdc25-22* block. (C) Percentage of septated cells following release from *cdc25-22* block.

| With normalisation | Subtelomeric number of oris | Top 10 percentage average (%) | Top 100 average (%) | Top 200 average (%) |
|--------------------|-----------------------------|-------------------------------|---------------------|---------------------|
| WT-18°C            | 40                          | 80.92215                      | 84.38209            | 76.12337            |
| WT-34°C            | 38                          | 87.34496                      | 88.9758             | 81.36208            |
| <i>set2Δ</i> -18°C | 39                          | 75.60882                      | 79.5611             | 70.82381            |
| <i>set2Δ</i> -34°C | 41                          | 83.43062                      | 85.93798            | 77.78305            |

| Without normalisation | Subtelomeric number of oris | Top 10 percentage average (%) | Top 100 average (%) | Top 200 average (%) |
|-----------------------|-----------------------------|-------------------------------|---------------------|---------------------|
| WT-18°C               | 40                          | 35.85002                      | 37.31833            | 33.72313            |
| WT-34°C               | 38                          | 57.22798                      | 58.25121            | 53.18669            |
| <i>set2Δ</i> -18°C    | 39                          | 33.88988                      | 35.65498            | 31.76588            |
| <i>set2Δ</i> -34°C    | 41                          | 56.5458                       | 58.22781            | 52.72425            |

**Figure S2 Analysis of origins usage at sub-telomeric regions or origin efficiency of the whole genome in vegetative wild-type and *set2Δ* cells at 18°C or 34°C, related to Figure 2.**

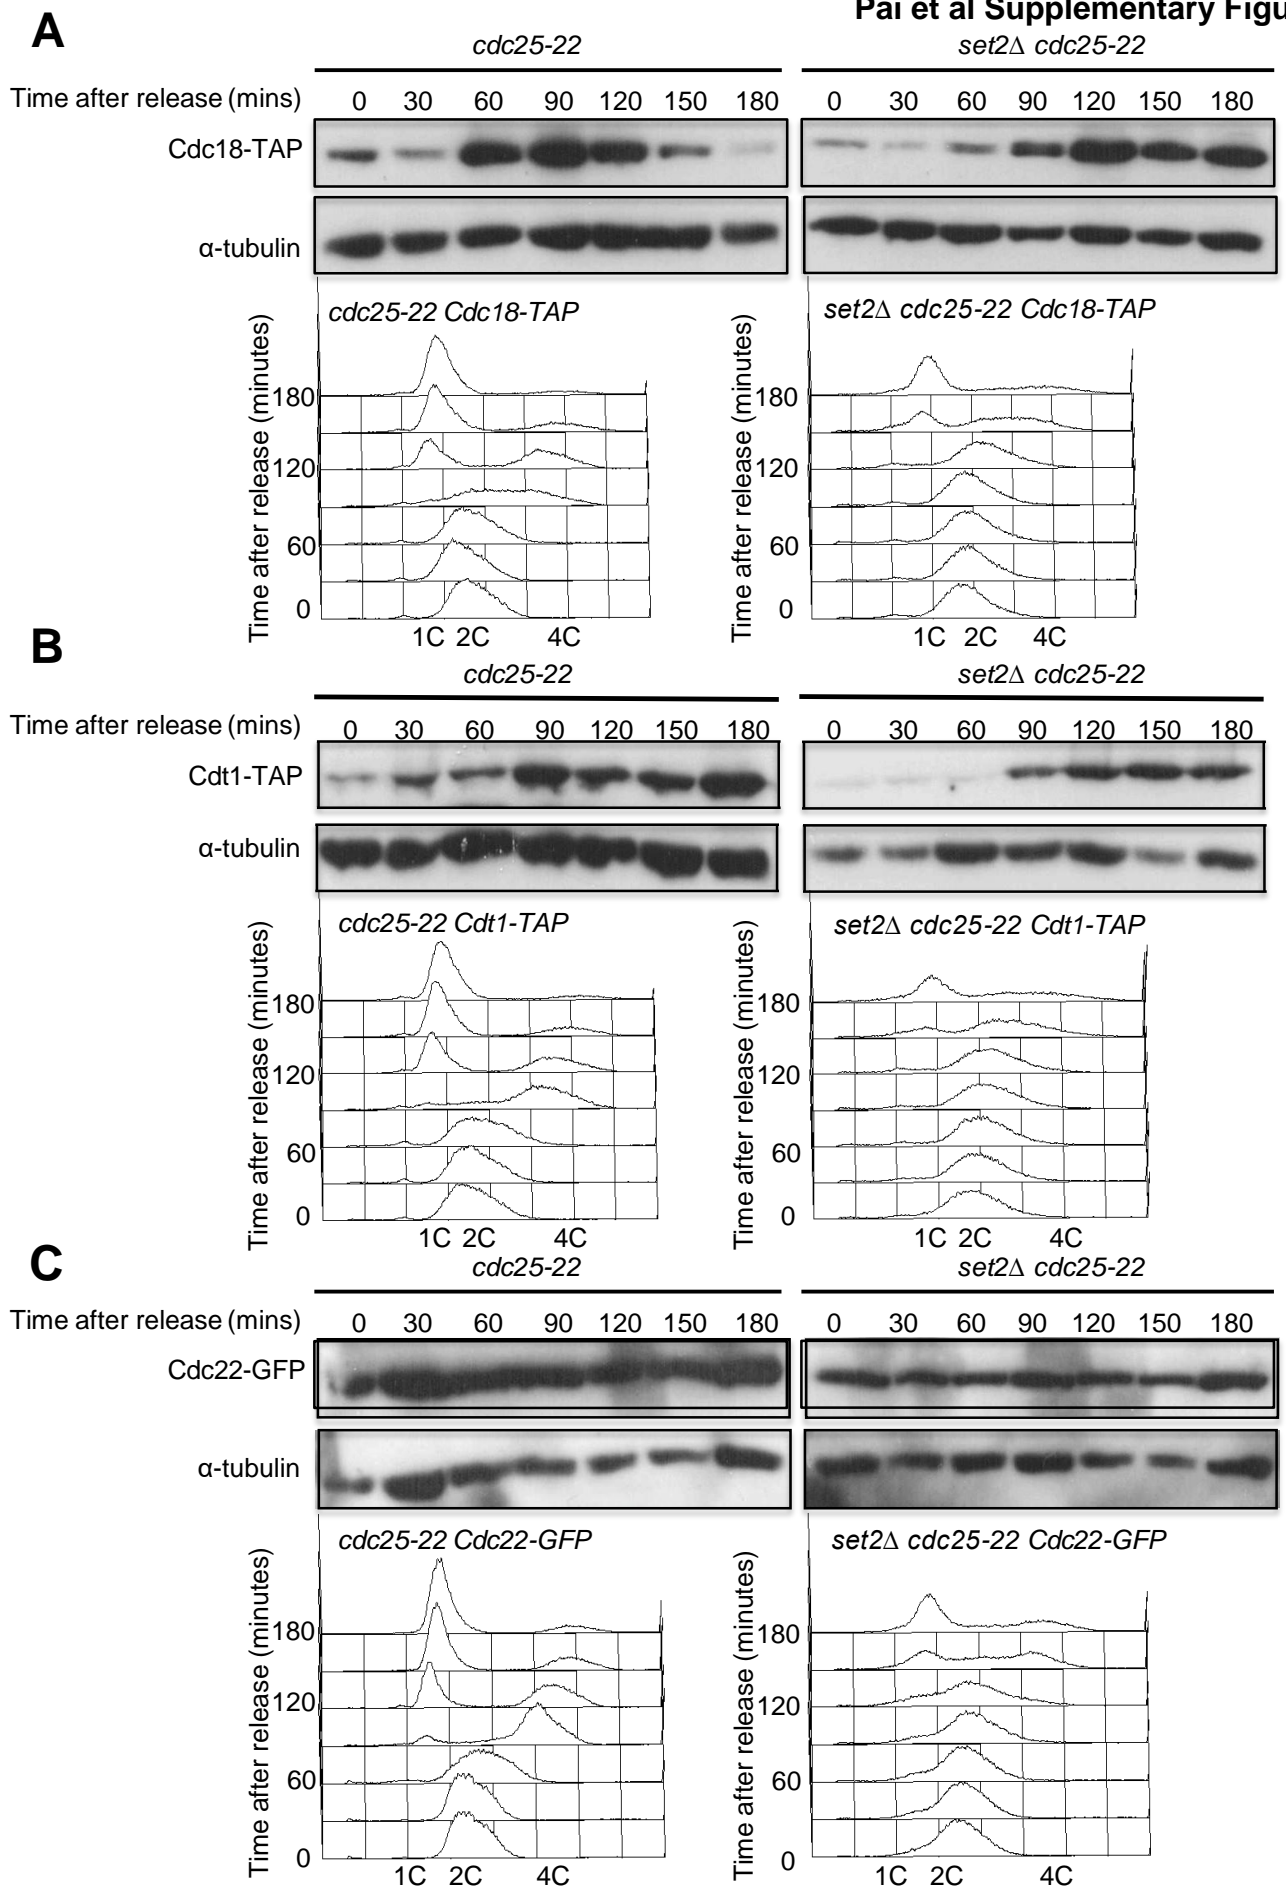

**Figure S3 Replication factors are misregulated in *set2Δ* cells, related to Figure 4.** (A) Western blot analysis of Cdc18-TAP levels following release from a *cdc25-22* block (35.5°C; 4.25 hours) in *cdc25-22* and *set2Δ cdc25-22* cells. FACS analysis of *cdc25-22* and *set2Δ cdc25-22* cells following release from a *cdc25-22* block. (B-C) Similar experiments were carried out as described in (A).

**A**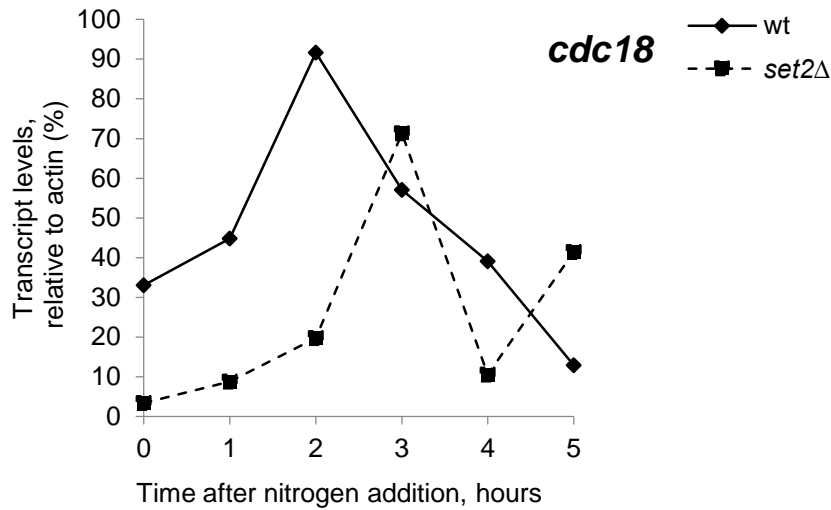**B**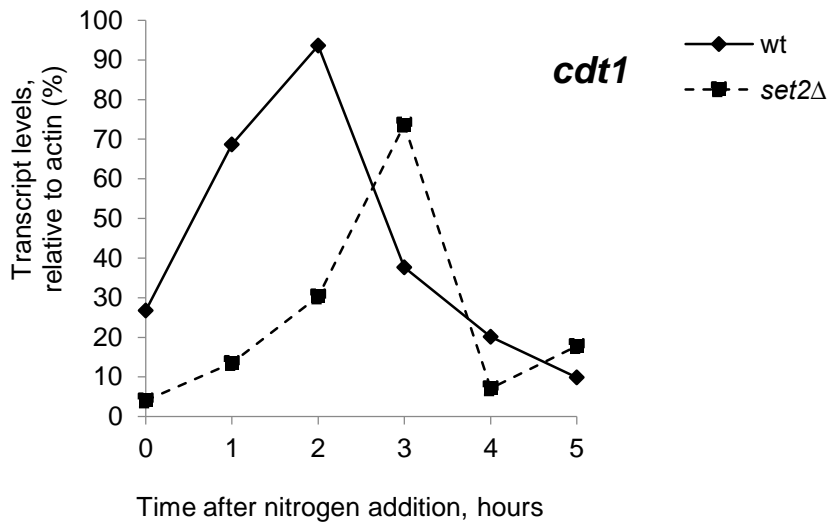**C**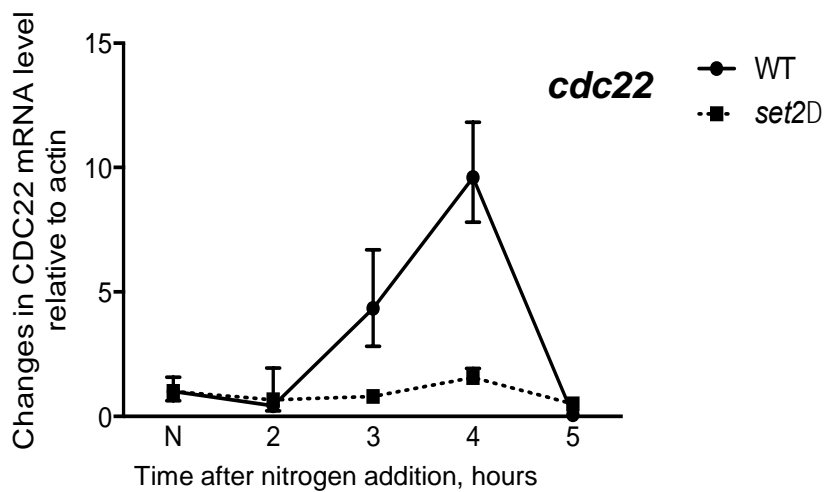

**Figure S4 Replication factors are misregulated in *set2* $\Delta$  cells, related to Figure 4.** Wild-type and *set2* $\Delta$  cells were arrested in EMM-N for 16 h at 25°C and then released into EMM+N. Samples for RNA extraction were collected at 0-5 hours after release from G1 arrest. RNA was extracted with Qiagen RNeasy kit and relative transcript levels of *cdc18* (A), *cdt1* (B) and *cdc22* (C) were established by RTqPCR.

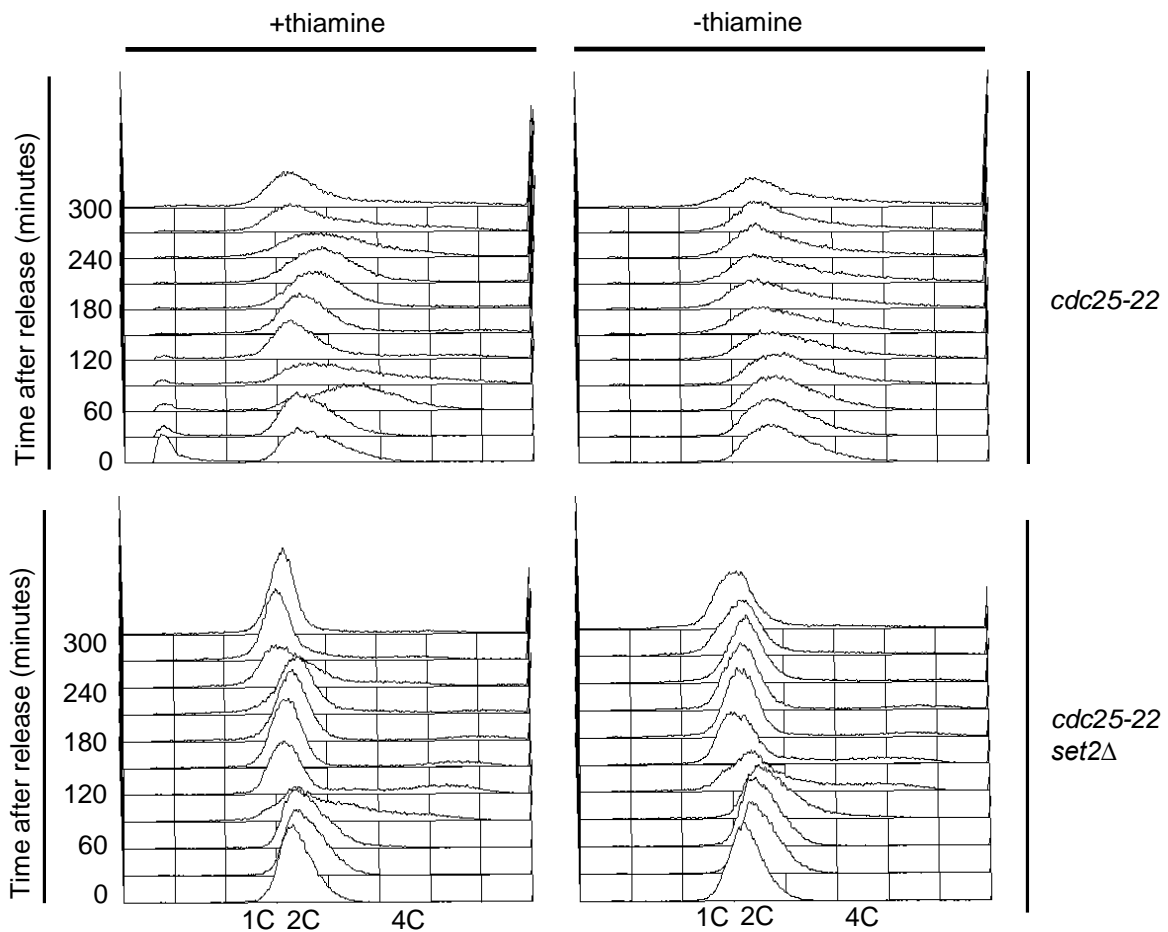

**Figure S5 Ectopic expression of *cdc18* and *cdt1* does not rescue the cell cycle defect of *set2Δ* cells, related to Figure 4.** *cdc25-22* or *set2Δ cdc25-22* cells were grown with (+thiamine) or without (-thiamine for 16 hours) ectopic expression of *cdc18* and *cdt1* from a REP81X plasmid, synchronised at G2/M using the *cdc25-22* block (35.5°C; 4.25 hours) and samples for flow cytometry taken every 30 minutes following release from *cdc25-22* block.

**A**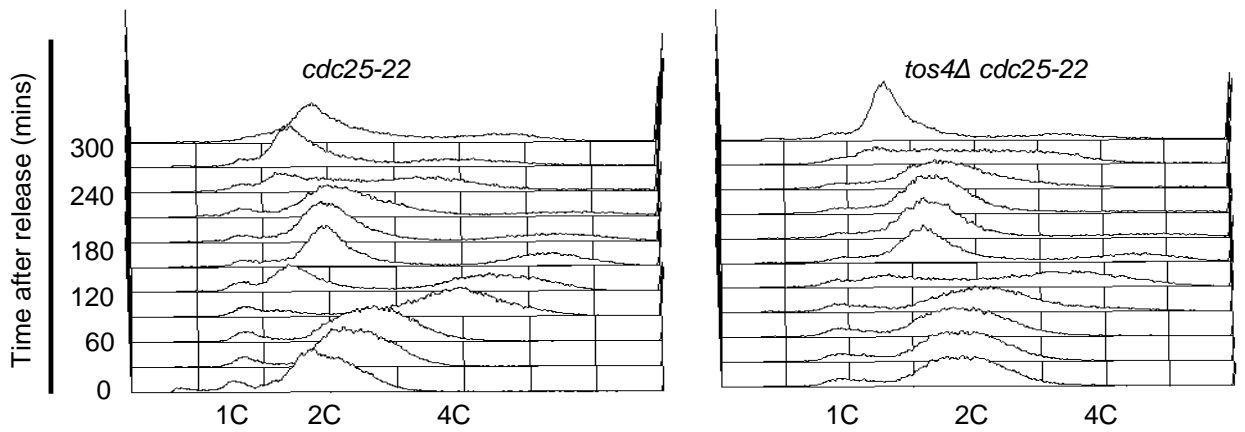**B**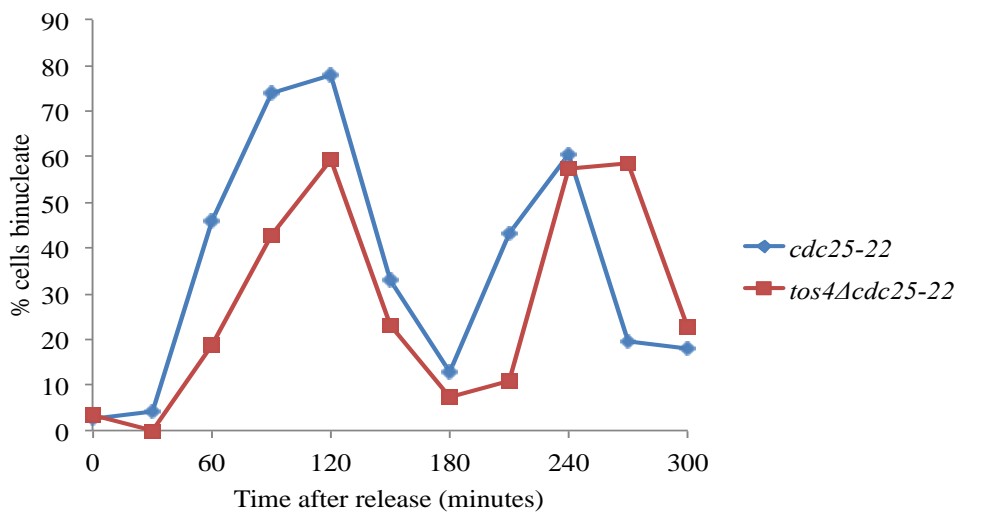**C**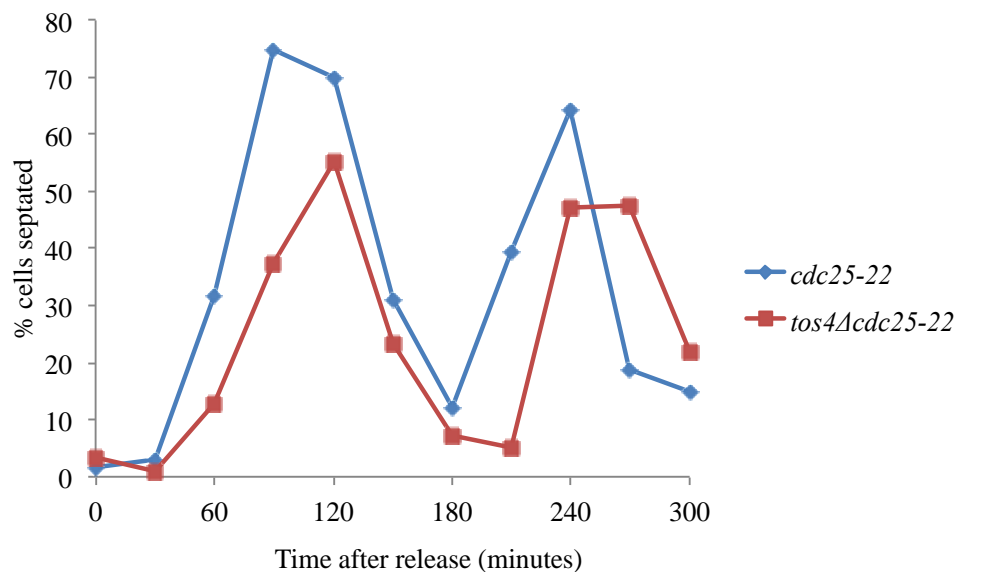

**Figure S6** *tos4Δ* cells progress normally through S phase, related to **Figure 3**. (A) Cell cycle analysis of *cdc25-22* and *tos4Δ cdc25-22* cells following release from *cdc25-22* block (35.5°C; 4.25 hours). (B) Percentage of cells binucleate following release from *cdc25-22* block. (C) Percentage of cells septated following release from *cdc25-22* block.

**A**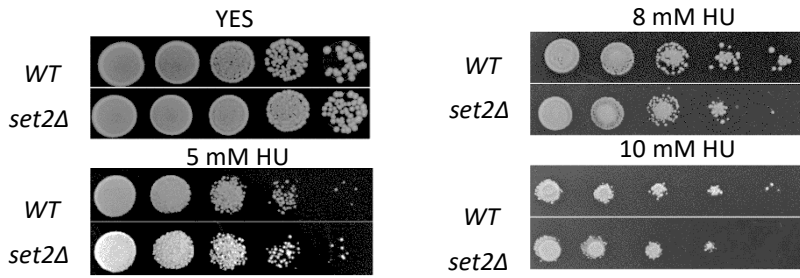**B**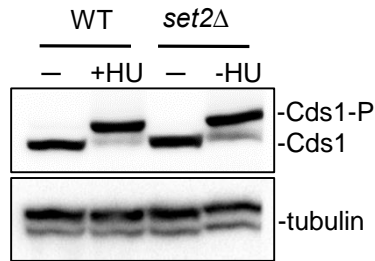**C**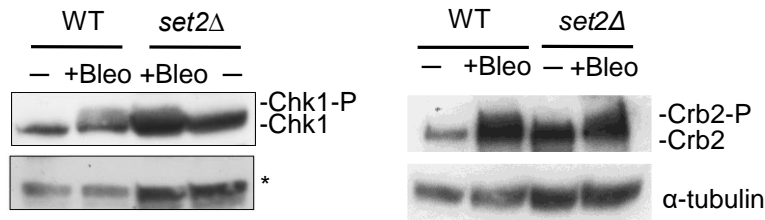**D**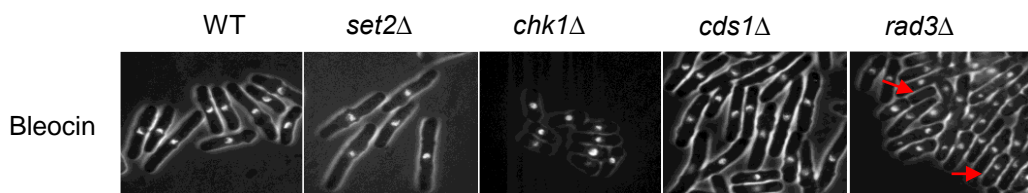

**Figure S7 Set2 is not required for checkpoint activation in response to DNA damage and replication stress, related to Figure 6.** (A) Serial dilution of a wild-type and *set2Δ* strains were spotted onto YES medium containing different concentration of HU as indicated. Plates were incubated at 30°C for 2-3 days (B) *Cds1-TAP* or *set2Δ Cds1-TAP* cells were grown in YES medium with or without 10 mM HU at 32°C. Western blotting of 2h HU-treated or untreated cell extracts for Cds1-TAP. α-tubulin was used as a loading control. (C) Western analysis of Chk1 or Crb2 phosphorylation following 1h treatment with 5μg/ml bleomycin at 26°C in wild-type or *set2Δ* cells. Asterisk indicates unspecific bands. (D) Each fixed culture from WT, *set2Δ* *chk1Δ*, *cds1Δ*, or *rad3Δ* strain was stained with DAPI and analysed by fluorescence microscopy showing nuclear morphology for each strain. Red arrows indicate the cut phenotype in the samples collected after 2h Bleocin treatment at 26°C.



**Table S1, related to Figure 1-7. Strains used in this study**

| <b>Strain</b> | <b>Genotype</b>                                                            | <b>Source</b>   |
|---------------|----------------------------------------------------------------------------|-----------------|
| TH 451        | <i>chk1::ura4 ade- leu1-32 h+</i>                                          | Lab stock       |
| TH 758        | <i>cds1::ura4 ura4-D18 leu1-32 h-</i>                                      | Lab stock       |
| TH 1543       | <i>cdc25-22 leu1-32 ade6-D1, ura4-D18 his3D h+</i>                         | Lab stock       |
| TH 2094       | <i>arg3-D4, ade6-D1, ura4-D18, leu1-32, his3-D1 h-</i>                     | Lab stock       |
| TH 3645       | <i>spd1::hygroR ura4-D18 leu1 ade6-704 h-</i>                              | Olaf Nielsen    |
| TH 3271       | <i>set2::ura4+ ade6-210 arg3-D4 his3-D1 leu1-32 ura4-D18 h-</i>            | Robin Allshire  |
| TH 6236       | <i>set2::kanMX ade6-210 leu1-32 ura4-D18 h-</i>                            | Robin Allshire  |
| TH 6237       | <i>set2::kanMX ade6-210 leu1-32 ura4-D18 h+</i>                            | Robin Allshire  |
| TH 6707       | <i>set2::ura4 cdc25-22</i>                                                 | This study      |
| TH 6877       | <i>972 h-</i>                                                              | Lab stock       |
| TH 6932       | <i>tos4::KanMX cdc25-22</i>                                                | This study      |
| TH 6919       | <i>set2::kanMX</i>                                                         | Robin Allshire  |
| TH 6999       | <i>set2::ura4 cdc25-22, pREP81x-cdt1 pREP81x-cdc18</i>                     | This study      |
| TH 7002       | <i>cdc25-22 leu1-32 ade6-D1, ura4-D18 his3D pREP81x-cdt1 pREP81x-cdc18</i> | This study      |
| TH 7133       | <i>set2::set2-R255G-ura4</i>                                               | Lab stock       |
| TH 7952       | <i>set2::kanMX chk1::ura4</i>                                              | This study      |
| TH 8459       | <i>set2::kanMX spd1::HygroR</i>                                            | This study      |
| TH 8590       | <i>crb2-YFP-leu+ crb2::ura4 set2::kanMx</i>                                | This study      |
| TH 8658       | <i>cds1::kanMX set2::kanMX</i>                                             | This study      |
| TH 8659       | <i>rad3::kanMX set2::kanMX</i>                                             | This study      |
| TH 8664       | <i>set2::kanMX yox1:: kanMX</i>                                            | This study      |
| TH 8662       | <i>cdc18-TAP::kanMX</i>                                                    | Stephen Kearsey |
| TH 8669       | <i>set2:: kanMX cdc18-TAP::kanMX</i>                                       | This study      |
| TH 8672       | <i>cdt1-TAP-KanMX</i>                                                      | Stephen Kearsey |
| TH 8726       | <i>set2::kanMX cdc22-D57N</i>                                              | This study      |
| TH 8727       | <i>cdc22-CFP:: kanMX</i>                                                   | Stephen Kearsey |
| TH 8729       | <i>set2:: kanMX cdc22-CFP:: kanMX</i>                                      | This study      |
| IM 655        | <i>rnh201::KanMX cdc20-M603F::lox ade6-704 leu1-32 ura4-D18 h-</i>         | Tony Carr       |

|        |                                                                                     |                  |
|--------|-------------------------------------------------------------------------------------|------------------|
| IM 856 | <i>rnh201::KanMX cdc6-L591G:lox ade6-704 leu1-32 ura4-D18 h-</i>                    | Tony Carr        |
| YAK250 | <i>set2::kanMx rnh201::HYG, cdc20-M603F ade6-704 leu1-32 ura4-D18 h-</i>            | Tony Carr        |
| YAK251 | <i>set2::kanMx rnh201::HYG, cdc6-L591G ade6-704 leu1-32 ura4-D18</i>                | Tony Carr        |
| RBP43  | <i>Res1-13myc:: kanMX, leu1-32, ura4-D18</i>                                        | Rob de Bruin     |
| RBP751 | <i>Res1-13myc:: kanMX, set2::ura4, ade6-210, arg3-D4, his3-D1, leu1-32 ura4-D18</i> | Rob de Bruin     |
| MG83   | <i>ura4::adh-dmNK-NAT-adh-hENT1 ura4-aim</i>                                        | Edgar Hartsuiker |

**Table S2, related to Figure 3, Figure 4 and Figure 7. Primers used in this study**

|              |           | FW                            | RV                        |
|--------------|-----------|-------------------------------|---------------------------|
| <i>cdc18</i> | RTqPCR    | GTAGGCATGCAATTGAACTTGCGG      | TCATAGCAGATGTCGCTCGGACAA  |
| <i>cdt1</i>  | RTqPCR    | ACCGTATGGCCAGAGTCATTTGCT      | AATTCAATGGAGCGGGAGAAGGCT  |
| <i>cdc22</i> | RTqPCR    | TGCAACGTGTTGAACGTAACGAGC      | AGGTAATGAACGACGACCACGGTT  |
| <i>tos4</i>  | RTqPCR    | TTCTGCAGTGAGAAGAGAGCCACT      | AACCGTGGATAGGACATGGTCACA  |
| <i>nrm1</i>  | RTqPCR    | GGGAAAGGCCAACAAACGAAGTGT      | ATCGAACC GCAATCGGTGAAATCG |
| <i>act1</i>  | RTqPCR    | CGCCGAACGTGAAATTGTTCTGTA      | TCAAGGGAGGAAGATTGAGCAGCA  |
|              |           |                               |                           |
| <i>cdc18</i> | ChIP qPCR | GGCATTTCATATCTTTGAGGATGAGTCGT | ATGTCGCGTTCAACTCTACGTGTC  |
| <i>cdt1</i>  | ChIP qPCR | TTTCAGAGAGCCTGAACTTGG         | CTCCTTTGCTCTGCGAGATATTA   |
| <i>cdc22</i> | ChIP qPCR | ACTTAAAGTTCGGATGACGCGACG      | GTTTGTAAGGTGGTAAATACCGGG  |
| <i>tos4</i>  | ChIP qPCR | CACTGGGTTACTCTCGTTTCTT        | CCTGGGTATAAACACGCTATGA    |
| <i>byr3</i>  | ChIP qPCR | TGGCAAGTTGTTGTGCTTCTTCCG      | TAACAAGCACATGGTGGCACTTGG  |
| <i>rps17</i> | ChIP qPCR | GCACCTGGTTTGTGTTGGTTG         | TTCGTAACCTCCGTCGCTTCTGTT  |
